# Supplementary material for: Phase I study of pucotenlimab (HX008), an anti-PD-1 antibody, for patients with advanced solid tumors
Source: PubMed Central journal article supplement — Ther Adv Med Oncol. 2021 May 31;13:17588359211020528. doi: 10.1177/17588359211020528 (PMC8182631; doi:10.1177/17588359211020528), 2021-05-31

Figure S1: **Immunohistochemical evaluation of tumor membranous PD-L1 expression (22C3).** (a, c) PD-L1 negative (from an enrolled patient with ovarian endometrioid adenocarcinoma), (b, d) PD-L1 positive control (from a patient with lung adenocarcinoma). Original magnification, 100 $\times$  for a, b and 200 $\times$  for c, d.

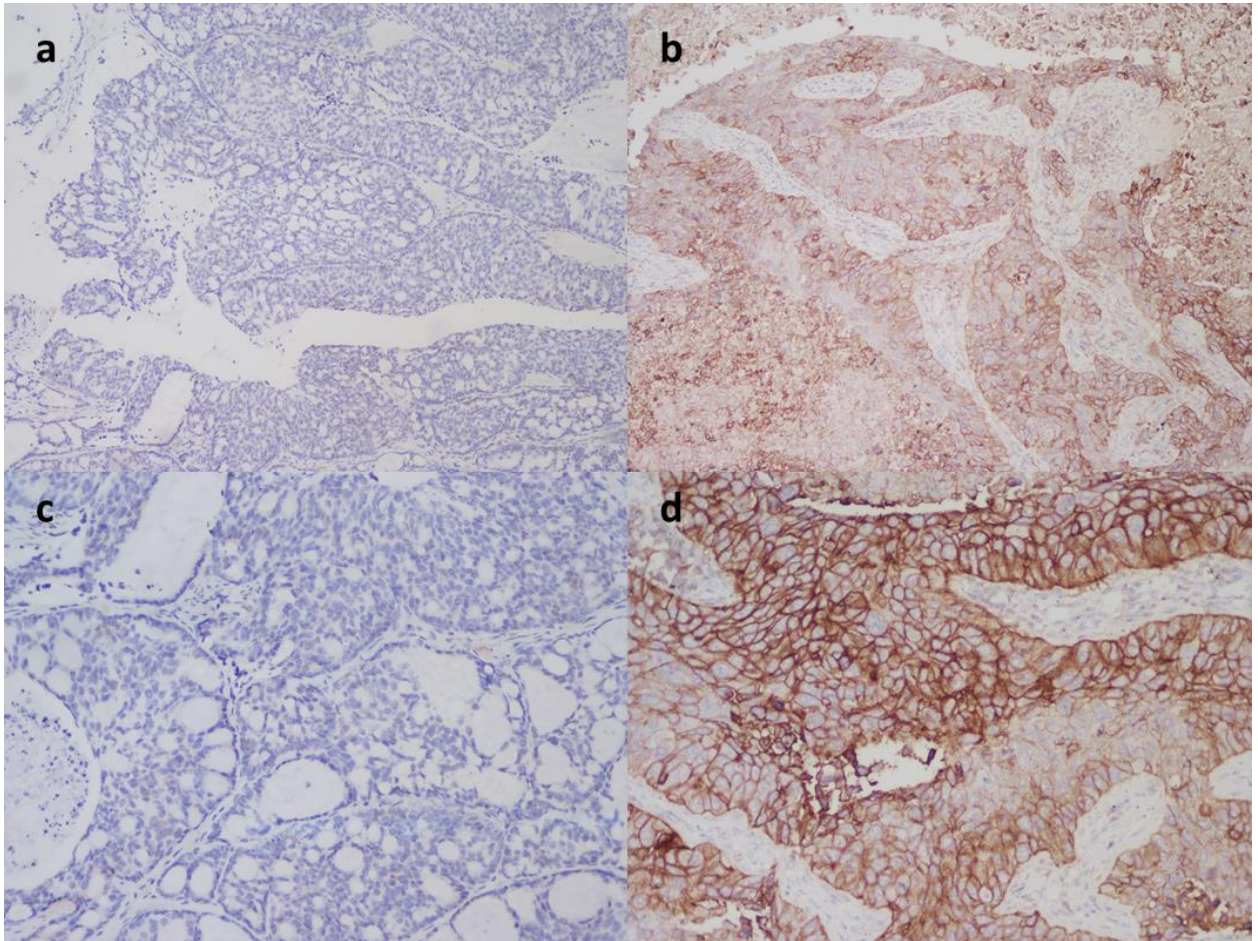

Supplement: sj-pdf-1-tam-10.1177_17588359211020528.pdf [file sj-pdf-1-tam-10.1177_17588359211020528.pdf]
